# Supplementary material
Source: publisher figshare collection journal article supplement (https://future-science-group.figshare.com/ndownloader/files/33851642)
Supplement: Supplementary file 1 [file 33851642]

**Title:** Indirect comparison of pembrolizumab monotherapy versus nivolumab+ipilimumab in first-line metastatic lung cancer

**Authors:** \*Balazs Halmos<sup>1</sup>, Thomas Burke<sup>2</sup>, Chrysostomos Kalyvas<sup>3</sup>, Ralph Insinga<sup>2</sup>, Kristel Vandormael<sup>3</sup>, Andrew Frederickson<sup>4</sup>, Bilal Piperdi<sup>5</sup>

**Table S1**

**Base case scenario of overall survival and progression-free survival in patients with PD-L1 TPS $\geq$ 1% before matching**

|                                                                      | Outcomes                 |                           |
|----------------------------------------------------------------------|--------------------------|---------------------------|
|                                                                      | Overall Survival         | Progression-Free Survival |
| <b>ITC HR (95% CI), p-value<sup>a</sup></b>                          |                          |                           |
| Primary approach <sup>b</sup>                                        | 0.98 (0.77, 1.26), 0.900 | 1.14 (0.92, 1.40), 0.224  |
| Secondary approach <sup>c</sup>                                      | 0.96 (0.78, 1.19), 0.719 | 1.10 (0.89, 1.34), 0.376  |
| <b>Number of events, (%)</b>                                         |                          |                           |
| Pembrolizumab                                                        | 469 (65.0)               | 549 (76.1)                |
| Nivolumab+ipilimumab                                                 | 259 (65.4)               | 289 (73.0)                |
| KN024/KN042: Chemotherapy <sup>d</sup>                               | 530 (75.0)               | 587 (83.0)                |
| Checkmate 227: Chemotherapy <sup>d</sup>                             | 299 (75.3)               | 286 (72.0)                |
| <b>Median Months, (95% CI)</b>                                       |                          |                           |
| Pembrolizumab                                                        | 17.3 (15.0; 20.0)        | 6.0 (4.6; 6.3)            |
| Nivolumab+ipilimumab                                                 | 16.9 (15.0; 20.0)        | 5.0 (4.0; 6.2)            |
| KN024/KN042: Chemotherapy <sup>d</sup>                               | 12.2 (11.3; 13.7)        | 6.3 (6.2; 6.5)            |
| Checkmate 227: Chemotherapy <sup>d</sup>                             | 14.9 (12.5; 16.8)        | 5.5 (4.8; 5.9)            |
| <b>Landmark rate (%) - Pembrolizumab versus nivolumab+ipilimumab</b> |                          |                           |
| 6-month                                                              | 73.5 vs 75.2             | 49.9 vs 45.6              |
| 1-year                                                               | 59.9 vs 62.4             | 30.9 vs 32.8              |
| 2-year                                                               | 40.8 vs 39.8             | 16.9 vs 22.0              |

a: Two-sided p-value calculated from the test statistic associated with the ITC estimate and its standard error

b: Calculated using aggregate data published in the literature for nivolumab+ipilimumab. Bucher methodology using separate study results (estimate and its standard error) with a common control arm

c: Calculated using pseudo-IPD from CheckMate227 Part 1A using a Cox regression model

d: Platinum-doublet chemotherapy for KN024/KN042 and CheckMate227 Part 1A

CI: confidence interval; HR: hazard ratio; ITC: indirect treatment comparison; KN024: KEYNOTE 024; KN42: KEYNOTE 042; PD-L1: Programmed cell death ligand 1; TPS: tumor proportion score.

**Table S2**

**Landmark analysis of overall survival and progression-free survival for chemotherapy arms from KN024/KN042 and CheckMate 227 Part 1a in patients with PD-L1 TPS $\geq$ 1% before and after matching**

|                                  | Landmark rate<br>6-month, % | Landmark rate<br>1-year, % | Landmark rate<br>2-year, % |
|----------------------------------|-----------------------------|----------------------------|----------------------------|
| <b>Overall survival</b>          |                             |                            |                            |
| Before Matching                  | 75.9 vs 78.4                | 50.8 vs 56.3               | 29.5 vs 33.3               |
| After Matching                   | 75.1 vs 78.4                | 52.2 vs 56.3               | 31.9 vs 33.3               |
| <b>Progression-free survival</b> |                             |                            |                            |
| Before Matching                  | 58.2 vs 42.6                | 25.9 vs 18.8               | 7.9 vs 7.3                 |
| After Matching                   | 57.7 vs 42.6                | 25.8 vs 18.8               | 7.2 vs 7.3                 |

KN024: KEYNOTE 024; KN042: KEYNOTE 042; PD-L1: Programmed cell death ligand 1; TPS: tumor proportion score.

**Table S3**

**Pembrolizumab versus nivolumab+ipilimumab for overall survival and progression-free survival in patients with PD-L1 TPS $\geq$ 1%, TPS $\geq$ 50% and TPS 1–49%**

|                                                               | Hazard Ratio (95% CI) |                   |
|---------------------------------------------------------------|-----------------------|-------------------|
|                                                               | Before Matching       | After Matching    |
| <b>Overall Survival, <math>\geq</math>1%</b>                  |                       |                   |
| Aggregate, truncated <sup>a</sup>                             | 0.98 (0.77; 1.26)     | 1.07 (0.82; 1.39) |
| Pseudo IPD, truncated                                         | 0.96 (0.78, 1.19)     | 1.05 (0.84, 1.31) |
| Aggregate, non-truncated                                      | 1.00 (0.78; 1.28)     | 1.08 (0.83, 1.41) |
| Pseudo IPD, non-truncated                                     | 0.97 (0.79; 1.20)     | 1.06 (0.85, 1.33) |
| <b>Progression-Free Survival (BICR), <math>\geq</math>1%</b>  |                       |                   |
| Aggregate, truncated <sup>a</sup>                             | 1.14 (0.92; 1.40)     | 1.16 (0.93, 1.45) |
| Pseudo IPD, truncated                                         | 1.10 (0.89, 1.34)     | 1.12 (0.90, 1.39) |
| Aggregate, non-truncated                                      | 1.14 (0.92; 1.40)     | 1.16 (0.93; 1.45) |
| Pseudo IPD, non-truncated                                     | 1.10 (0.89; 1.34)     | 1.12 (0.90; 1.39) |
| <b>Overall Survival, <math>\geq</math>50%</b>                 |                       |                   |
| Aggregate, truncated <sup>a</sup>                             | 1.00 (0.75; 1.35)     | 1.05 (0.78; 1.42) |
| Pseudo IPD, truncated                                         | 1.01 (0.75; 1.37)     | 1.06 (0.78; 1.44) |
| Aggregate, non-truncated                                      | 1.03 (0.77, 1.38)     | 1.08 (0.80, 1.45) |
| Pseudo IPD, non-truncated                                     | 1.03 (0.77; 1.39)     | 1.08 (0.80, 1.47) |
| <b>Progression-Free Survival (BICR), <math>\geq</math>50%</b> |                       |                   |
| Aggregate, truncated <sup>a</sup>                             | 1.19 (0.89, 1.58)     | 1.16 (0.87; 1.55) |
| Pseudo IPD, truncated                                         | 1.18 (0.88, 1.57)     | 1.15 (0.86; 1.55) |
| Aggregate, non-truncated                                      | 1.19 (0.89, 1.58)     | 1.16 (0.87, 1.55) |
| Pseudo IPD, non-truncated                                     | 1.18 (0.88, 1.57)     | 1.15 (0.86, 1.55) |
| <b>Overall Survival, 1–49%</b>                                |                       |                   |
| Aggregate, non-truncated                                      | 0.94 (0.68, 1.28)     | 0.96 (0.65, 1.40) |
| <b>Progression-Free Survival (BICR), 1–49%</b>                |                       |                   |
| Aggregate, non-truncated                                      | 1.10 (0.81, 1.50)     | 1.04 (0.73, 1.48) |

a: The aggregate/truncated analysis corresponds to the base case analysis and is included for comparison purposes.

BICR: blinded independent committee review; CI: confidence intervals; IPD: individual patient data; PD-L1: Programmed cell death ligand 1; TPS: tumor proportion score.
